# Supplementary material for: Genome-wide computational identification of functional RNA elements in Trypanosoma brucei
Source: PubMed Central journal article supplement (PMC2907701; doi:10.1186/1471-2164-10-355), 2009-08-04

Secondary structure:  $\Delta G = -27.3\text{kcal/mol}$

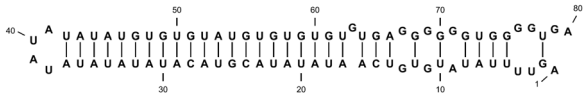

Secondary structure:  $\Delta G = -26.3\text{kcal/mol}$

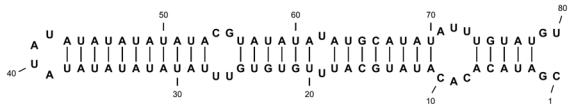

Secondary structure:  $\Delta G = -26.0\text{kcal/mol}$

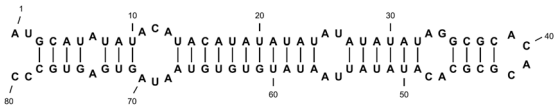

Secondary structure:  $\Delta G = -27.0\text{kcal/mol}$

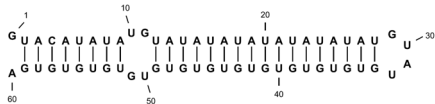

Secondary structure:  $\Delta G = -26.5\text{kcal/mol}$

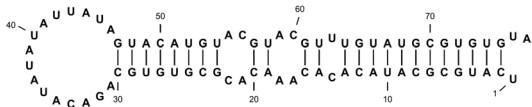

Supplement: 1471-2164-10-355-S3.pdf [file 1471-2164-10-355-S3.pdf]
