# Supplementary material for: Genome-wide computational identification of functional RNA elements in Trypanosoma brucei
Source: PubMed Central journal article supplement (PMC2907701; doi:10.1186/1471-2164-10-355), 2009-08-04

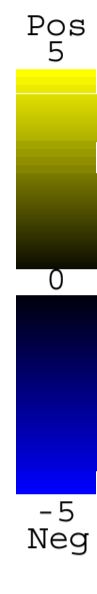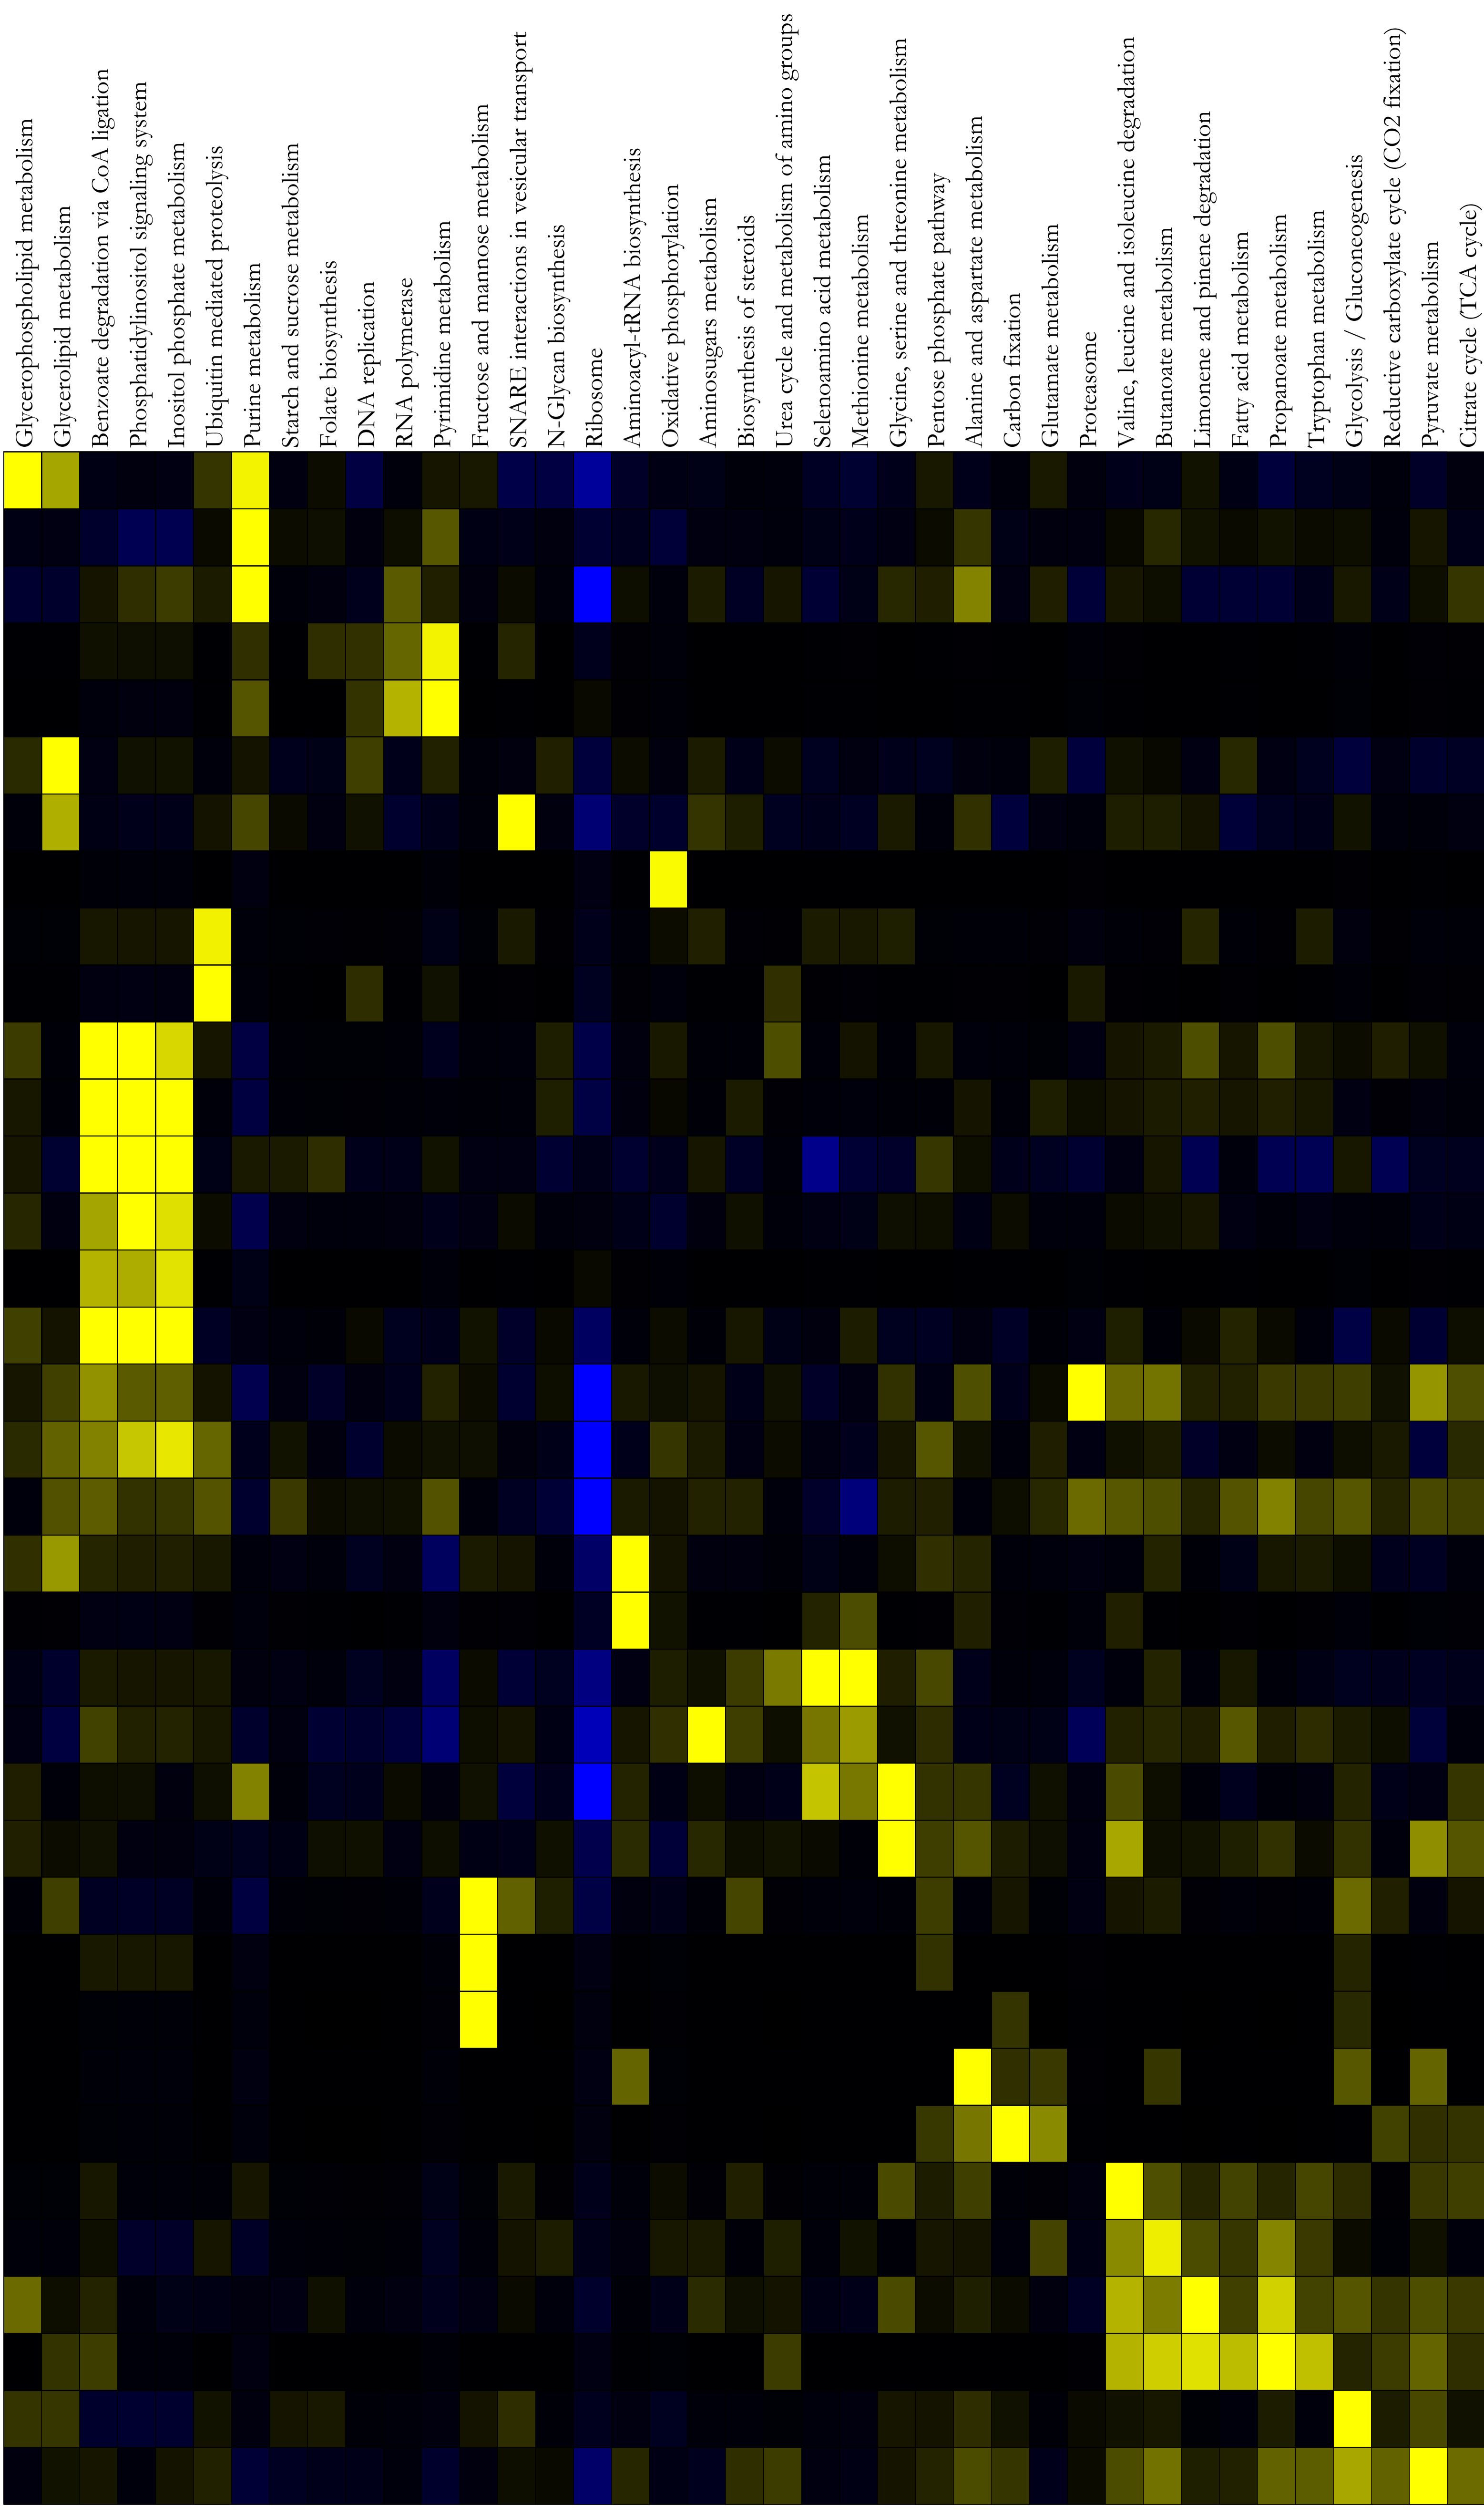

Supplement: 1471-2164-10-355-S5.pdf [file 1471-2164-10-355-S5.pdf]
